# Supplementary material for: Suitability of memory aids and strategies for people with posterior cortical atrophy: protocol for a scoping review
Source: PubMed Central journal article supplement (PMC10061751; doi:10.1186/s13643-023-02187-4), 2023-03-30
Supplement: 13643_2023_2187_MOESM1_ESM.pdf [file 13643_2023_2187_MOESM1_ESM.pdf]

Search Strategy for PsycINFO search; scoping review

1. (dementia).ti,ab
2. \*DEMENTIA/
3. (alzheim\*).ti,ab
4. \*"ALZHEIMER'S DISEASE"/
5. ("posterior cortical atrophy").ti,ab
6. (PCA).ti,ab
7. ("mild cognitive impairment\*").ti,ab
8. (1 OR 2 OR 3 OR 4 OR 5 OR 6 OR 7)
9. (memory).ti,ab
10. (memories).ti,ab
11. \*MEMORY/
12. (9 OR 10 OR 11)
13. ("memory strateg\*").ti,ab
14. ("memory aid\*").ti,ab
15. (compensatory).ti,ab
16. (restorative).ti,ab
17. ("enhanced learning").ti,ab
18. (external ADJ2 strateg\*).ti,ab
19. (internal ADJ2 strateg\*).ti,ab
20. (internal ADJ2 aid\*).ti,ab
21. (external ADJ2 aid\*).ti,ab
22. ("assistive technolog\*").ti,ab
23. ("assistive device\*").ti,ab
24. ("task modificat\*").ti,ab
25. ("task adaptat\*").ti,ab

26. ("environment\* modificat\*").ti,ab
27. ("environment\* adaptat\*").ti,ab
28. (remind\*).ti,ab
29. (Plann\*).ti,ab
30. (calendar\*).ti,ab
31. (sign\*).ti,ab
32. (list\*).ti,ab
33. (checklist\*).ti,ab
34. (diar\*).ti,ab
35. (mental picture\*).ti,ab
36. ("expand\* rehearsal\*").ti,ab
37. ("space\* retrieval\*").ti,ab
38. (cue\*).ti,ab
39. (prompt\*).ti,ab
40. (chunking).ti,ab
41. ("method of loci").ti,ab
42. (mnemonic\*).ti,ab
43. ("action learn\*").ti,ab
44. ("action based learn\*").ti,ab
45. ("errorless learn\*").ti,ab
46. (chaining).ti,ab
47. (modelling).ti,ab
48. (modeling).ti,ab
49. ("semantic associat\*").ti,ab
50. ("memory navigat\*").ti,ab
51. ("memory device\*").ti,ab
52. ("adaptive technolog\*").ti,ab

53. ("adaptive device\*").ti,ab

54. ("prompting tool\*").ti,ab

55. ("prompting device\*").ti,ab

56. ("electronic\* device\*").ti,ab

57. ("electronic\* aid\*").ti,ab

58. (smartphone\*).ti,ab

59. (tablet\*).ti,ab

60. (app\*).ti,ab

61. (13 OR OR 14 OR 15 OR 16 OR 17 OR 18 OR 19 OR 20 OR 21 OR 22 OR 23 OR  
24 OR 25 OR 26 OR 27 OR 28 OR 29 OR 30 OR 31 OR 32 OR 33 OR 34 OR 35 OR  
36 OR 37 OR 38 OR 39 OR 40 OR 41 OR 42 OR 43 OR 44 OR 45 OR 46 OR 47 OR  
48 OR 49 OR 50 OR 51 OR 52 OR 53 OR 54 OR 55 OR 56 OR 57 OR 58 OR 59 OR  
60)

62. 8 AND 12 AND 67 [DT 1990-2020] [Languages English]
